# Supplementary material for: EDTA-mediated hydrothermal synthesis of NaEu(MoO4)2 microrugbies with tunable size and enhanced luminescence properties
Source: Royal Society of Chemistry journal article supplement (doi:10.1039/c1ce05181d), 2011-01-01
Supplement: c1ce05181d.pdf [file c1ce05181d.pdf]

## Supporting information for

# EDTA-mediated hydrothermal synthesis of $\text{NaEu}(\text{MoO}_4)_2$ microrugbies with tunable size and enhanced luminescence properties

Lin Xu, Xiaoyan Yang, Zheng Zhai, Xing Chao, Zihui Zhang, Wenhua Hou\*

Key Laboratory of Mesoscopic Chemistry of MOE, School of Chemistry and Chemical

Engineering, Nanjing University, Nanjing 210093, P. R. China.

\*Corresponding author. Fax: +86-25-83317761; Tel: +86-25-83686001; E-mail:

[whou@nju.edu.cn](mailto:whou@nju.edu.cn)

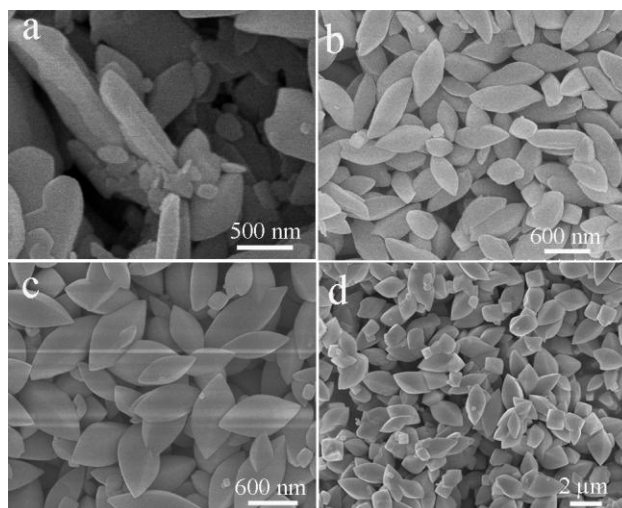

**Supporting Information, Fig. S1.** Representative SEM images of the products obtained in the presence of different amounts of EDTA at 180 °C for 24 h. (a) 0 g EDTA, (b) 0.20 g EDTA, (c) 0.30 g EDTA and (d) 0.70 g EDTA.

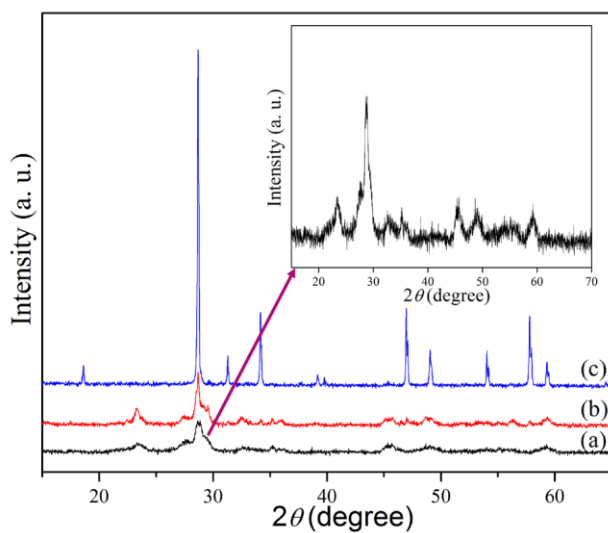

**Supporting Information, Fig. S2.** XRD patterns of the intermediate products collected at different stages. (a) 0.5 h, (b) 2 h, and (c) 6 h.

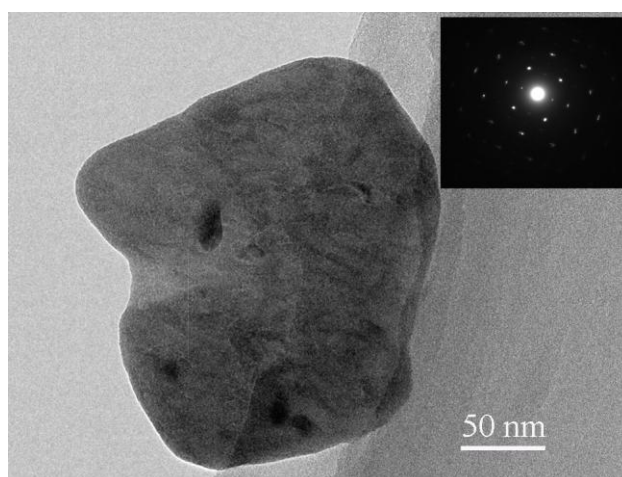

**Supporting Information, Fig. S3.** TEM image and the corresponding SAED pattern of a single nanosheet collected at 0.5 h.
